# Supplementary material for: Non-canonical Wnt signaling regulates junctional mechanocoupling during angiogenic collective cell migration
Source: eLife journal article supplement (doi:10.7554/elife.45853), 2019-06-27
Supplement: supp [file elife-45853-supp-v1.zip]

Archive with 12 entries (12 files):
- elife_poa_e45853_Figure_7_figure_supplement_1.ai
- elife_poa_e45853_Figure_1_figure_supplement_1.ai
- elife_poa_e45853_Video1.mov
- elife_poa_e45853_Source_code_1.m
- elife_poa_e45853_Figure_8_figure_supplement_1.ai
- elife_poa_e45853_Video2.mov
- elife_poa_e45853_Video3.avi
- elife_poa_e45853_Source_code_2.m
- elife_poa_e45853_Video4.avi
- elife_poa_e45853_Figure_7_figure_supplement_2.ai
- elife_poa_e45853_Figure_9_figure_supplement_1.ai
- elife_poa_e45853_Transparent_Reporting_File.pdf
