# Supplementary material for: Non-canonical Wnt signaling regulates junctional mechanocoupling during angiogenic collective cell migration
Source: eLife journal article supplement (doi:10.7554/elife.45853), 2019-06-27
Supplement: supp [file elife-45853-supp-v1.zip › elife_poa_e45853_Source_code_1.m]

function[Res,FileName]=Coloc_Final_4_Lab(infile)
filer=sbe(infile,1); 
header={'FileName'};
B=[];
% xlswrite('Colocalization Results',header,1,'A1');
%%display a prompt to select number of channels and which ones are to be
%%analysed
prompt={'Enter Nunber of channels','Enter channels for coloc (space separated)','Reference Channel'};
dlgtitle='Input';
    
  answers = inputdlg(prompt,dlgtitle);
    NChannels=str2num(answers{1,:});
    ChanneltoColoc=str2num(answers{2,:});
    ReferenceCh=str2num(answers{3,:});
    n=nchoosek(ChanneltoColoc,2);
   
    %% loads file 1 to set the threshold
    file=filer(1).name;
    File=bfOpen3DVolume(file);File=File{1};File=File{1};
    %% Median Filtering
    for i=1:size(File,3)
            ImClean(:,:,i)=medfilt2(File(:,:,i));
    end
    if ~isempty (ReferenceCh);
        RefIm=ImClean(:,:,ReferenceCh:NChannels:end);
        MipRefIm=max(RefIm,[],3);
        BWRef=im2bw(MipRefIm);
        BWRef=bwareaopen(BWRef,20);
        imagesc(BWRef);
    end
    for z=1:size(ChanneltoColoc,2)

            a=ChanneltoColoc(z);
            
            %makes MIp images and their bw
            ImageCH=ImClean(:,:,a:NChannels:end);
            MipCh=max(ImageCH,[],3);
            Images{a,1}=MipCh;
            Th=graythresh(MipCh)
            %%Setting the  threshold based on image Sic2, HBSS_DMEM_30
            BWCh=im2bw(MipCh);BWCh=bwareaopen(BWCh,20);
            
            figure; imagesc(BWCh);
            prompt = 'Is the threshold correct? Y/N: ';
           
            str = input(prompt,'s');
             while str~= 'y'
                if isempty(str)| str=='y'
                    str = 'y';
                    
                else if str=='n'
                        prompt={'Enter Th'};
                        dlgt='Threshold';
                        ans = inputdlg(prompt,dlgt);
                        Th=str2num(ans{1,:});
                        
                        BWCh=im2bw(MipCh,Th);
                        imagesc(BWCh);
                       prompt = 'Is the threshold correct? Y/N: ';
                       str = input(prompt,'s');
                      
                end
                end
             end
        TH(z)=Th;
        if ~isempty (ReferenceCh);
            BWCh=imadd(BWCh,BWRef);
            BWCh(BWCh==1)=0;
            BWCh=im2bw(BWCh);
        end
        Images{a,2}=BWCh;
        close all
    end
    B=[B,Images];
     for z=1:size(n,1)
         
         p=n(z,:);
         
     indColoc=find(Images{p(1),2}~=0 & Images{p(2),2}~=0);
     ind1=find(Images{p(1),2}~=0);
     ind2=find(Images{p(2),2}~=0);
     cCh12=(100*size(indColoc,1))/size(ind1,1);
     cCh21=(100*size(indColoc,1))/size(ind2,1);
     Results{1,z}=[p,cCh12,cCh21];
         end
    Res.Images=Images;
    Res.Coloc=Results;
    FileName={file};
       N=num2str(1);
     Range=['B' N];
     NameRange=['A' N];
      xlswrite('Colocalization Results',FileName,1,NameRange)
    %% loads each file
 if size(filer,2)>1 
for k=2:length (filer)
    file=[filer(k).name];
    disp(file);
        File=bfOpen3DVolume(file);File=File{1};File=File{1};
        
        %%median filtering
        for i=1:size(File,3)
            ImClean(:,:,i)=medfilt2(File(:,:,i));
        end
        if ~isempty (ReferenceCh);
        RefIm=ImClean(:,:,ReferenceCh:NChannels:end);
        MipRefIm=max(RefIm,[],3);
        BWRef=im2bw(MipRefIm);
        BWRef=bwareaopen(BWRef,20);
        imagesc(BWRef);
    end
        for z=1:size(ChanneltoColoc,2)
            Th=TH(z);
            a=ChanneltoColoc(z)
            
            %makes MIp images and their bw
            ImageCH=ImClean(:,:,a:NChannels:end);
            MipCh=max(ImageCH,[],3);
            Images{a,1}=MipCh;
           
            %%Setting the  threshold based on image Sic2, HBSS_DMEM_30
            BWCh=im2bw(MipCh,Th);BWCh=bwareaopen(BWCh,20);
            
            figure; imagesc(BWCh);
            if ~isempty (ReferenceCh)
            BWCh=imadd(BWCh,BWRef);
            BWCh(BWCh==1)=0;
            BWCh=im2bw(BWCh);
        end
            Images{a,2}=BWCh;
            B=[B;Images];
            pause(1)
            close all
        end
       
 
     %finds pixels which are 0 in each channels
     
     for z=1:size(n,1)
         p=n(z,:);
         
     indColoc=find(Images{p(1),2}~=0 & Images{p(2),2}~=0);
     ind1=find(Images{p(1),2}~=0);
     ind2=find(Images{p(2),2}~=0);
     cCh12=(100*size(indColoc,1))/size(ind1,1);
     cCh21=(100*size(indColoc,1))/size(ind2,1);
     Results{k,z}=[p,cCh12,cCh21];
     
    
     end
     
      
     
 
Res.Coloc=Results;
Res.Images=B;
%      %%Saves all the data as xlsfile
      
 %      data=num2cell(D);
      %output=[Res];
%      N=num2str(k+1);
%      Range=['B' N];
%      NameRange=['A' N];
      FileName={file};
       N=num2str(k);
     Range=['B' N];
     NameRange=['A' N];
      xlswrite('Colocalization Results',FileName,1,NameRange)
end
end
      output=[];

     for p=1:size(Results,1)
         d=[];
         for P=1:size(Results,2)
             d=[d,Results{p,P}];
         end
         output=[output;d];
         clear('d')
     end
          xlswrite('Colocalization Results',output,1,'B');
          save('Colocalization Results+Images.mat','Res');
